# Supplementary material for: Down Syndrome Fetal Fibroblasts Display Alterations of Endosomal Trafficking Possibly due to SYNJ1 Overexpression
Source: PubMed Central journal article supplement (PMC9136301; doi:10.3389/fgene.2022.867989), 2022-05-13
Supplement: DataSheet1.pdf [file DataSheet1.pdf]

*Supplementary Material*

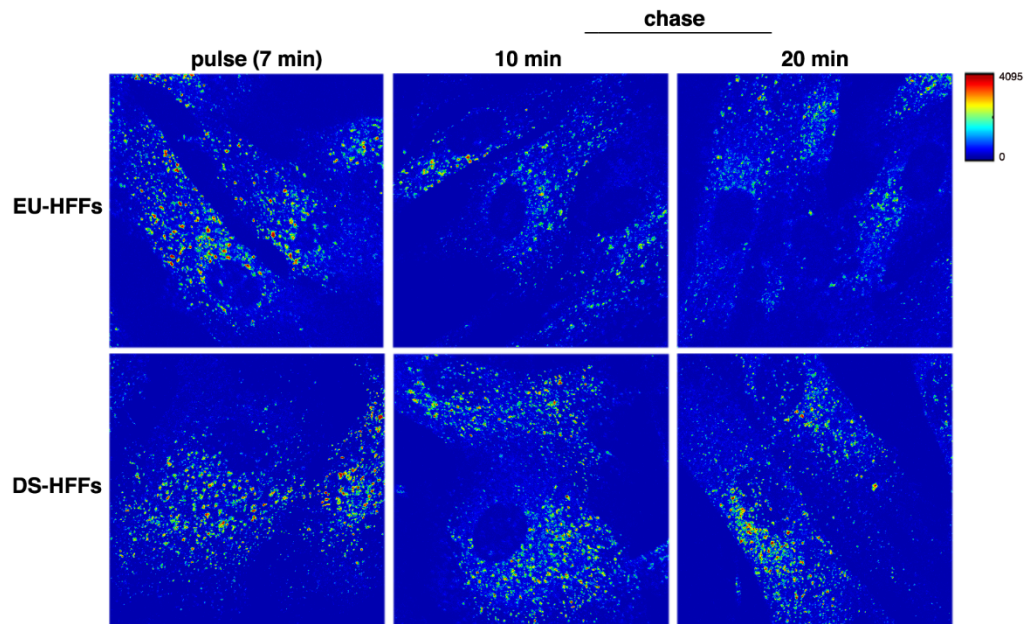

**Supplementary Figure 1. TF recycling in DS fetal fibroblasts.** Note that the fluorescence signal decreases in EU-HFFs, while remains higher in DS-HFFs indicating TF accumulation.

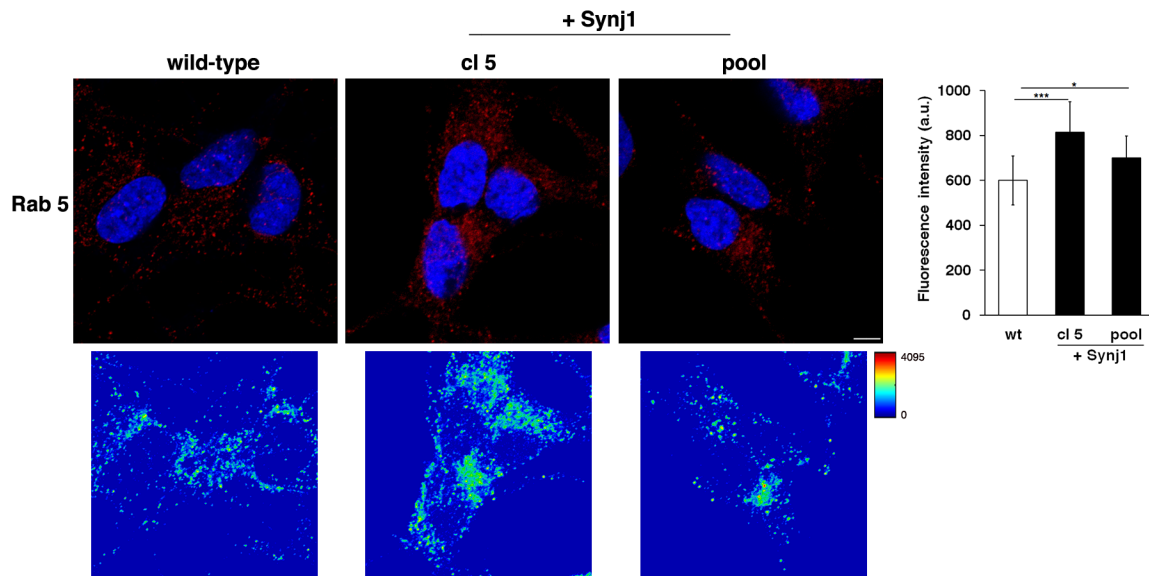

**Supplementary Figure 2. Synj1 overexpression affects the homeostasis of early endosomes in SH-SY5Y cells.** SH-SY5Y cells stably transfected with cDNA encoding for wild-type Synj1 were stained with Rab5 antibody detected with Alexa-546-conjugated secondary antibodies. Serial confocal sections were collected from the top to the bottom of the cells. The 3D reconstructions and corresponding intensity maps are shown. Scale bars, 5  $\mu$ m. Mean fluorescence intensity (arbitrary unit, a.u.) of Rab5-positive structures is shown. The bars show the relative mean value  $\pm$  SD of three independent experiments. \* $p < 0.05$ , \*\*\* $p < 0.001$ , Student's  $t$ -test.

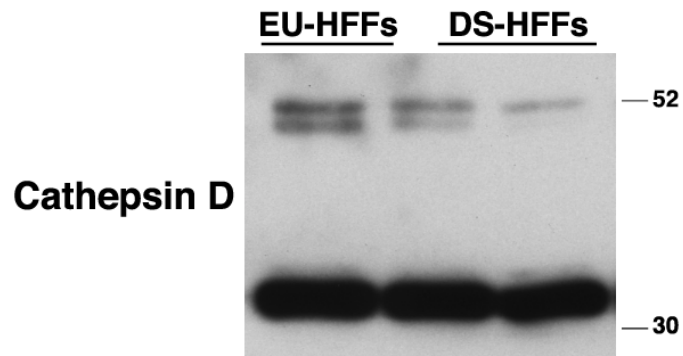

**Supplementary Figure 3. Levels of cathepsin D are comparable in EU-HFFs and DS-HFFs.** The longer exposure of immunoblot in Figure 8C is shown. Mature (33 kDa) and immature (52 kDa) forms of cathepsin D are visible.
